# Supplementary material for: Polymer encapsulation effects on the magnetism of EuS nanocrystals
Source: Royal Society of Chemistry journal article supplement (doi:10.1039/b806499g), 2008-01-01
Supplement: b806499g.pdf [file b806499g.pdf]

## Polymer encapsulation effects on the magnetism of EuS nanocrystals

Angela S. Pereira, Protima Rauwel, Mário S. Reis, Nuno J. O. Silva, Ana Barros-Timmons, Tito Trindade

J. Mater. Chem.

### SUPPORTING INFORMATION

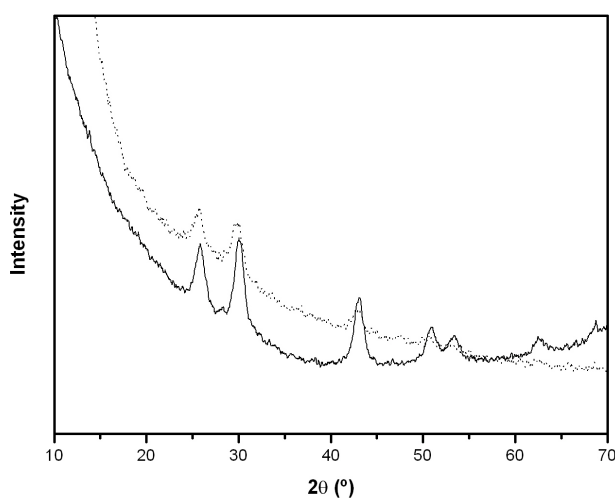

Powder XRD patterns of the EuS/PS nanocomposite (dotted line) and the EuS nanocrystals (full line).

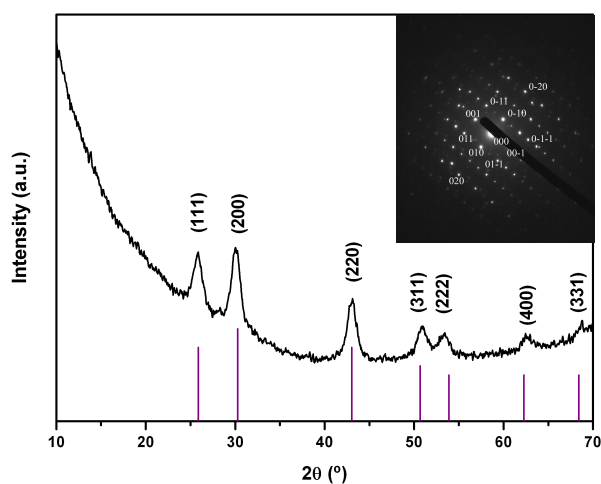

Powder XRD of EuS nanospheres; Inset: Electron diffraction patterns of EuS nanocubes.

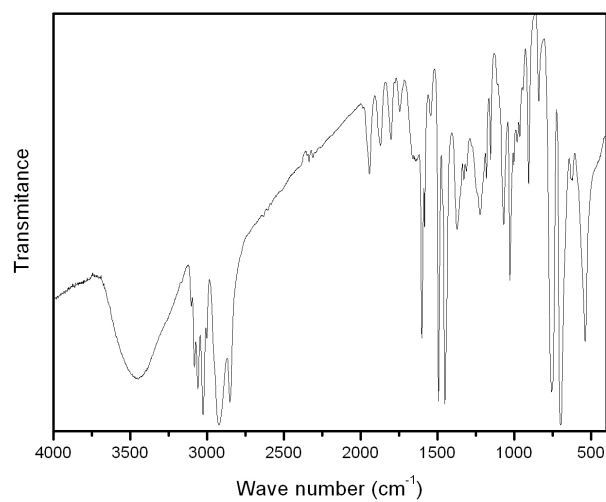

FT-IR spectrum of a EuS/PS nanocomposite sample.

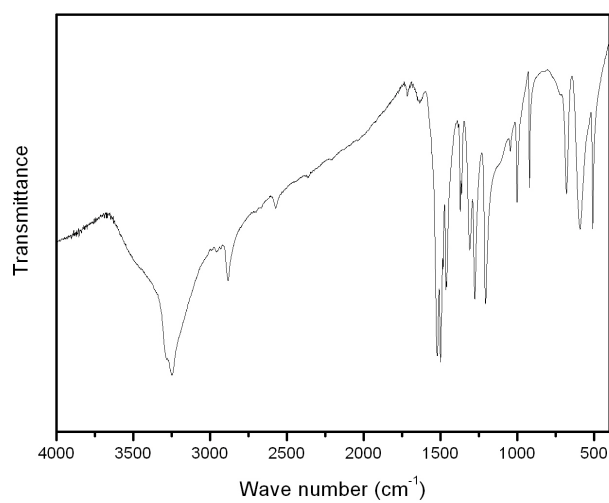

FT-IR spectrum of OA capped EuS nanocrystals.

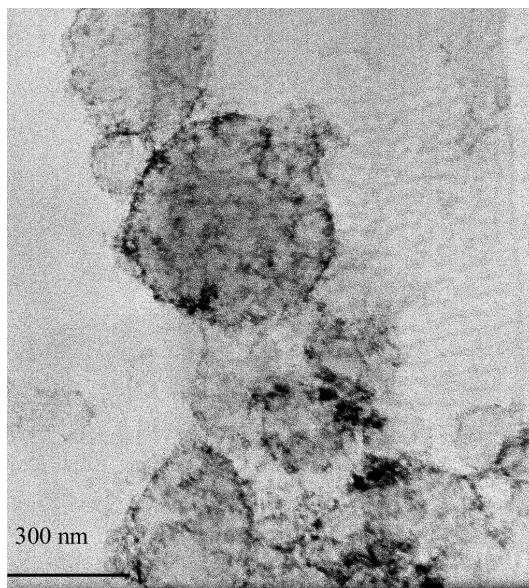

TEM image of a sample obtained after polymerization of styrene in the presence of  
EuS nanocubes.

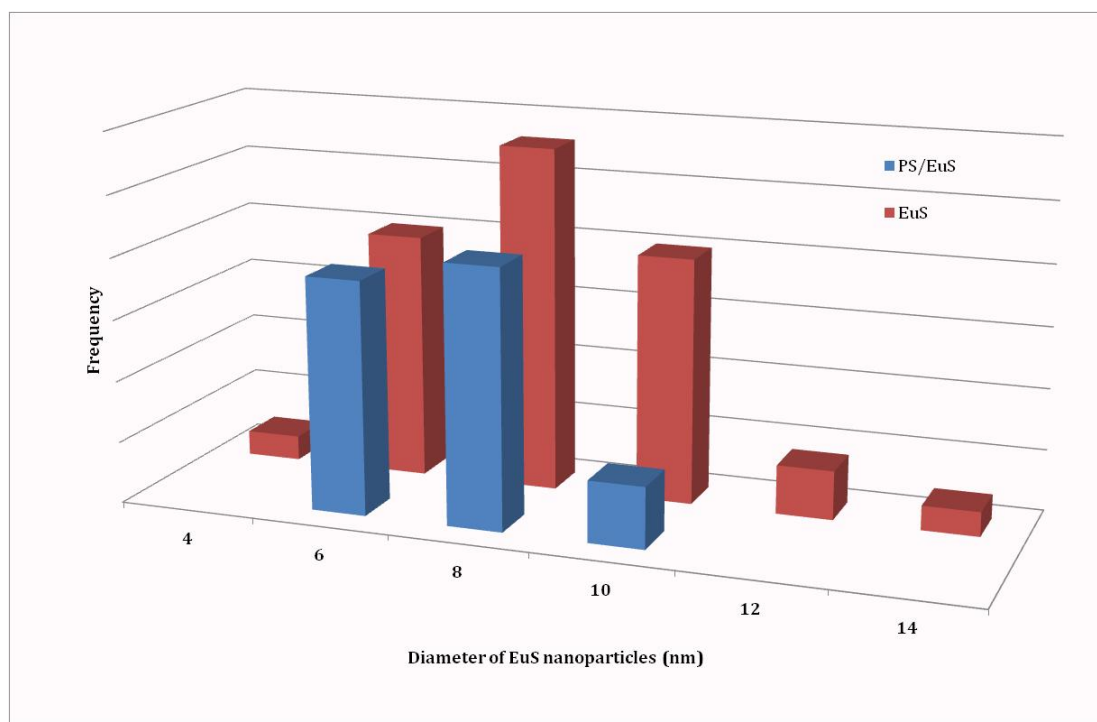

Histograms of EuS nanospheres as prepared and in the polystyrene nanocomposite  
(measurements were performed on TEM images)
